# Supplementary material for: Purification and Characterization of Pathogenesis Related Class 10 Panallergens
Source: PubMed Central journal article supplement (PMC6963334; doi:10.3390/foods8120609), 2019-11-22
Supplement: foods-08-00609-s001.pdf [file foods-08-00609-s001.pdf]

**Supplemental Figure S1:** Tandem Mass Spectrometry Data of PR-10 proteins

|                | Subgroup (#) | Spectra (#) | Distinct Peptides (#) | Distinct Summed MS/MS Search Score | % AA Coverage        | Total Protein Spectral Intensity | Database Accession # | Protein Name |
|----------------|--------------|-------------|-----------------------|------------------------------------|----------------------|----------------------------------|----------------------|--------------|
| 1              | 1.1          | 64          | 14                    | 259.11                             | <a href="#">76.8</a> | 5.69e+009                        | <a href="#">7</a>    | Que a 1.03   |
| 1              | 1.2          | 52          | 14                    | 256.21                             | <a href="#">89.3</a> | 3.75e+009                        | <a href="#">6</a>    | Que a 1.02   |
| 2              | 2.1          | 52          | 13                    | 227.91                             | <a href="#">75</a>   | 2.09e+009                        | <a href="#">4</a>    | Cor a 1.02   |
| 3              | 3.1          | 83          | 12                    | 211.98                             | <a href="#">74.5</a> | 1.57e+009                        | <a href="#">2</a>    | Ara h 8.02   |
| 4              | 4.1          | 24          | 11                    | 201.55                             | <a href="#">73.9</a> | 2.48e+009                        | <a href="#">5</a>    | Cor a 1.04   |
| 5              | 5.1          | 57          | 11                    | 189.50                             | <a href="#">61.2</a> | 6.82e+009                        | <a href="#">3</a>    | Bet v 1      |
| 6              | 6.1          | 38          | 12                    | 189.15                             | <a href="#">82.1</a> | 1.97e+009                        | <a href="#">1</a>    | Ara h 8.01   |
| <b>Totals:</b> | 370          | 87          |                       |                                    |                      |                                  |                      |              |

### Ara h 8.01

1 **MGVTFE**DEI **TSTVPPAK**LY **NAMKDAD**SIT **PKIIDDV**KSV **EIVEGN**GGPG **TIK**KL**TIVED** **GETK**FIL**HKV** **ESIDE**ANYAY 80  
 81 **NYS**V**GGVAL** **PPTAEK**ITFE **TKL**VEGPNGG **SIGK**LT**LKYH** **TK**G**DAK**PDEE **ELK**K**GK**AK**GE** **GLFRA**IEGYV **LAN**PT**QY** 157

The matched peptides cover **82%** (130/157 AA's) of the protein.

Protein Name: **Ara h 8.01**

**NCBI**nr.**Jane\_1** Accession #: **1**

MS Digest Index #: **1**

Protein MW: **16951.9** Da

Amino Acid Composition: **A11 D9 E16 F5 G17 H2 I12 K18 L10 M2 N6 P9 Q1 R1 S6 T13 V12 Y7**

### Ara h 8.02

1 **MGVHTF**EEES **TSPVPPAK**LF **KATVVD**GDEL **TPK**LIPAIQS **IEIVEGN**GGP **GTVK**K**VTA**VE **DGK**TSY**VLHK** **IDA**IDEAT**YT** 80  
 81 **YDYTI**SGGTG **FQEILEK**VSF **KTK**LEA**DGG** **SK**I**K**VSV**TFH** **TKG**DAP**LPDE** **VH**Q**DVK**Q**KSQ** **GIFK**AIEGYV **LSN** 153

The matched peptides cover **75%** (115/153 AA's) of the protein.

Protein Name: **Ara h 8.02**

**NCBI**nr.**Jane\_1** Accession #: **2**

MS Digest Index #: **2**

Protein MW: **16412.2** Da

Amino Acid Composition: **A10 D10 E13 F6 G15 H4 I11 K16 L8 M1 N2 P8 Q5 S10 T14 V15 Y5**

### Bet v 1.01

1 **MGVFN**YETET **TSVIPA**ARLF **KAFIL**DGD**NL** **FPK**VAPQ**AI**S **SVENIE**GNGG **PGTIK**K**ISFP** **EGFP**FK**YV**KD **RV**DEVD**DHTNF** 80  
 81 **KY**N**YS**V**IEGG** **PIG**DT**LEK**IS **NEI**K**IV**AT**PD** **GG**S**ILK**I**SNK** **YHTK**G**DHEV**K **AEQV**K**ASK**EM **GET**LL**RAVES** **YLLA**HS**DAYN** 160

The matched peptides cover **61%** (98/160 AA's) of the protein.

Protein Name: **Bet v 1**

**NCBI**nr.**Jane\_1** Accession #: **3**

MS Digest Index #: **3**

Protein MW: **17570.5** Da

Amino Acid Composition: **A11 D9 E14 F8 G14 H4 I13 K15 L9 M2 N9 P8 Q2 R3 S11 T9 V12 Y7**

**Supplemental Figure S1: Tandem Mass Spectrometry Data of PR-10 proteins**  
**Cor a 1.02**

1 **MGVFN****YETES** **TSVIPAAR**LF K**AFILDG****NNL** **IPK**VAPQ**AVS** SVENVEGNNG PGTIKKITFS **EGSPFK**YVKE **RVEEVDHTNF** 80  
81 **KYSY****TVIEGG** **PVGDK**VEKIC **NEIK**IIVA**APD** **GG**SILK**ISNK** YHTKGDHEVD **AEHIK**GGKEK **VEGLFRAVEA** **YLLAHS**DAYN 160

The matched peptides cover **75%** (121/160 AA's) of the protein.

Protein Name: **Cora 1.02**

NCBI Inr.Jane\_1 Accession #: **4**

MS Digest Index #: **4**

Protein MW: **17416.3** Da

Amino Acid Composition: **A12 C1 D7 E16 F7 G16 H5 I12 K16 L7 M1 N9 P7 Q1 R3 S10 T7 V16 Y7**

**Cor a 1.04**

1 **MGVFC****YEDEA** **TSVIPP**AR**LF** K**SFVLD****DADNL** **IPK**VAPQHFT SAENLEGNNG PGTIKKITFA **EGNEFK**YMKH **KVEEIDHANE** 80  
81 **KYC****YSII****EGG** **PLGHT**LEKIS **YEIK**MAA**APH** **GG**SILK**ITS** KYHTK**GNASI** **NEEEIK**AGKE **KAAGLFKAVE** **AYLLAHP**DAY 160  
161 C 161

The matched peptides cover **74%** (120/161 AA's) of the protein.

Protein Name: **Cora 1.04**

NCBI Inr.Jane\_1 Accession #: **5**

MS Digest Index #: **5**

Protein MW: **17580.7** Da

Amino Acid Composition: **A18 C3 D5 E16 F8 G15 H7 I13 K17 L10 M3 N7 P8 Q1 R1 S8 T7 V6 Y8**

**Que a 1.02**

1 **MGVFT****HESQE** **TSVI**AP**AR****LF** K**ALFLD****SDNL** **IQK**VLPQ**AIK** **STEIIEGNNG** PGTIKKITFG **EASK**FKYAKH **RIDALDPENC** 80  
81 **TYSF****SVIEGD** **ALT**V**MESV****ST** **EIK**CV**ASPDG** **GSIMK**STTKY QTKGDFQLKE **EIQQA**IEKA **AGLLKAVEAY** **LVAHPDLYK** 159

The matched peptides cover **89%** (143/159 AA's) of the protein.

Protein Name: **Que a 1.02**

NCBI Inr.Jane\_1 Accession #: **6**

MS Digest Index #: **6**

Protein MW: **17302.5** Da

Amino Acid Composition: **A16 C2 D8 E13 F7 G11 H3 I13 K16 L12 M3 N3 P6 Q7 R2 S12 T11 V9 Y5**

**Que a 1.03**

1 **MGVFT****YESED** **ASVI**P**PAR****LF** K**AFVLD****SDNL** **IPK**VVPQ**ALK** **STEIIEGNNG** PGTIKKITFG **EGSHL**KHAKH **RIDVIDPENF** 80  
81 **TYSF****SVIEGD** **ALF**D**KLEN****VS** **TET**K**I****VASPD** **GG**SIVK**STSK** YQTKGDFQ**L****T** **DELIR**GGKEK **ASEVFKAVEA** **YLVAHPDLYK** 160

The matched peptides cover **76%** (123/160 AA's) of the protein.

Protein Name: **Que a 1.03**

NCBI Inr.Jane\_1 Accession #: **7**

MS Digest Index #: **7**

Protein MW: **17477.5** Da

Amino Acid Composition: **A11 D11 E13 F9 G13 H4 I12 K16 L11 M1 N4 P8 Q3 R3 S13 T10 V13 Y5**
